# Supplementary material for: High BMI and Low Muscular Fitness Predict Low Motor Competence in School-Aged Children Living in Low-Resourced Areas
Source: MDPI journal article supplement (doi:10.3390/ijerph18157878), 2021-07-25
Supplement: s1 [file s1]

## Supplementary materials

**Table S1:** Differences in motor competences between boys and girls across different age groups

| Age groups | Motor competence  | Independent Mann-Whitney U test: p-value |
|------------|-------------------|------------------------------------------|
| 6          | Static Balance    | .254                                     |
|            | Dynamic Balance   | .816                                     |
|            | Jumping & hopping | .530                                     |
| 7          | Static Balance    | .606                                     |
|            | Dynamic Balance   | .636                                     |
|            | Jumping & hopping | .949                                     |
| 8          | Static Balance    | .209                                     |
|            | Dynamic Balance   | .496                                     |
|            | Jumping & hopping | .040                                     |
| 9          | Static Balance    | .368                                     |
|            | Dynamic Balance   | .435                                     |
|            | Jumping & hopping | .942                                     |
| 10         | Static Balance    | .513                                     |
|            | Dynamic Balance   | .366                                     |
|            | Jumping & hopping | .540                                     |
| 11&12      | Static Balance    | .987                                     |
|            | Dynamic Balance   | .626                                     |
|            | Jumping & hopping | <.001                                    |

**Figure S1:** Median jumping and hopping SIS for boys and girls across age groups

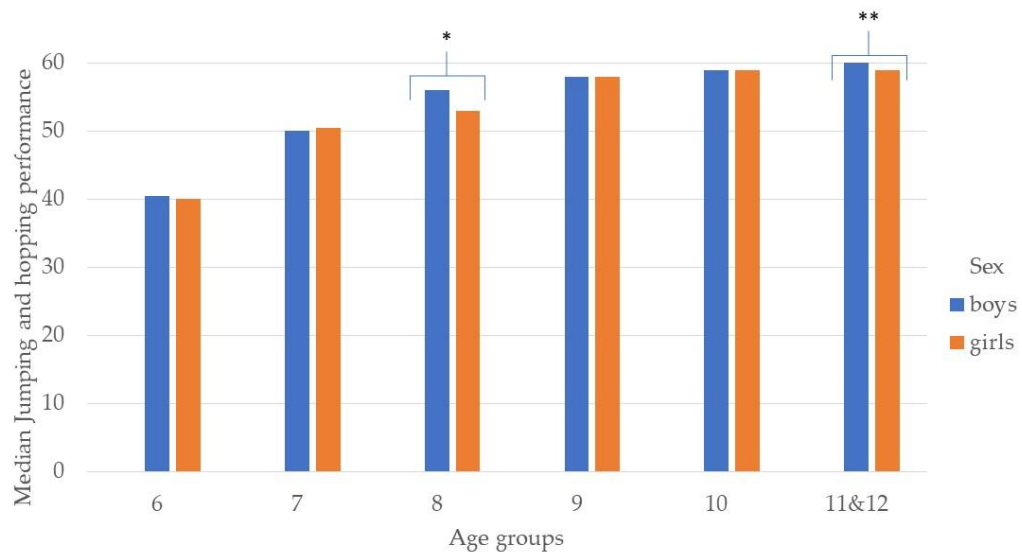

\* Significant difference between boys and girls ( $p < 0.05$ )

\*\* Significant difference between boys and girls ( $p < 0.001$ )
